# Supplementary material for: Accurate long-read transcript discovery and quantification at single-cell, pseudo-bulk and bulk resolution with Isosceles
Source: PubMed Central journal article supplement — Nat Commun. 2024 Aug 25;15:7316. doi: 10.1038/s41467-024-51584-3 (PMC11345431; doi:10.1038/s41467-024-51584-3), 2024-08-25
Supplement: 41467_2024_51584_MOESM3_ESM.pdf [file 41467_2024_51584_MOESM3_ESM.pdf]

## **Description of Additional Supplementary Files:**

**Supplementary Data 1:** Results of the (a) DEXSeq intra-trajectory analysis, (b) DEXSeq inter-trajectory analysis, (c) Isosceles `isoform switching` analysis.

**Supplementary Data 2:** RNA-Seq samples quantified in VastDB (sources extracted from Supplemental Table 1 of Tapial et al. 2017; doi: 10.1101/gr.220962.117) that were used to create Fig. 4e and Supplementary Fig. 8
